# Supplementary material for: The cytotoxicity and mechanism of action of new multinuclear Scaffold AuIII, PdIIpincer complexes containing a bis(diphenylphosphino) ferrocene/non-ferrocene ligand
Source: Royal Society of Chemistry journal article supplement (doi:10.1039/c7dt02887c), 2017-01-01
Supplement: c7dt02887c1.pdf [file c7dt02887c1.pdf]

## Supporting Information

### **Cytotoxicity and Mechanism of Action of New Multinuclear Scaffold Au<sup>III</sup>, Pd<sup>II</sup> Pincer Complexes Containing Bis(diphenylphosphino) Ferrocene/Non-Ferrocene Ligand**

Leila Tabrizi <sup>\*a,b</sup>, Hossein Chiniforoshan <sup>\*b</sup>

<sup>a</sup> School of Chemistry, National University of Ireland, Galway, University Road, Galway, Ireland

<sup>b</sup> Department of Chemistry, Isfahan University of Technology, Isfahan 84156-83111, Iran

Corresponding author: Leila Tabrizi; Email: LEILA.TABRIZI@nuigalway.ie

Corresponding author: H. Chiniforoshan; Email: Chinif@cc.iut.ac.ir

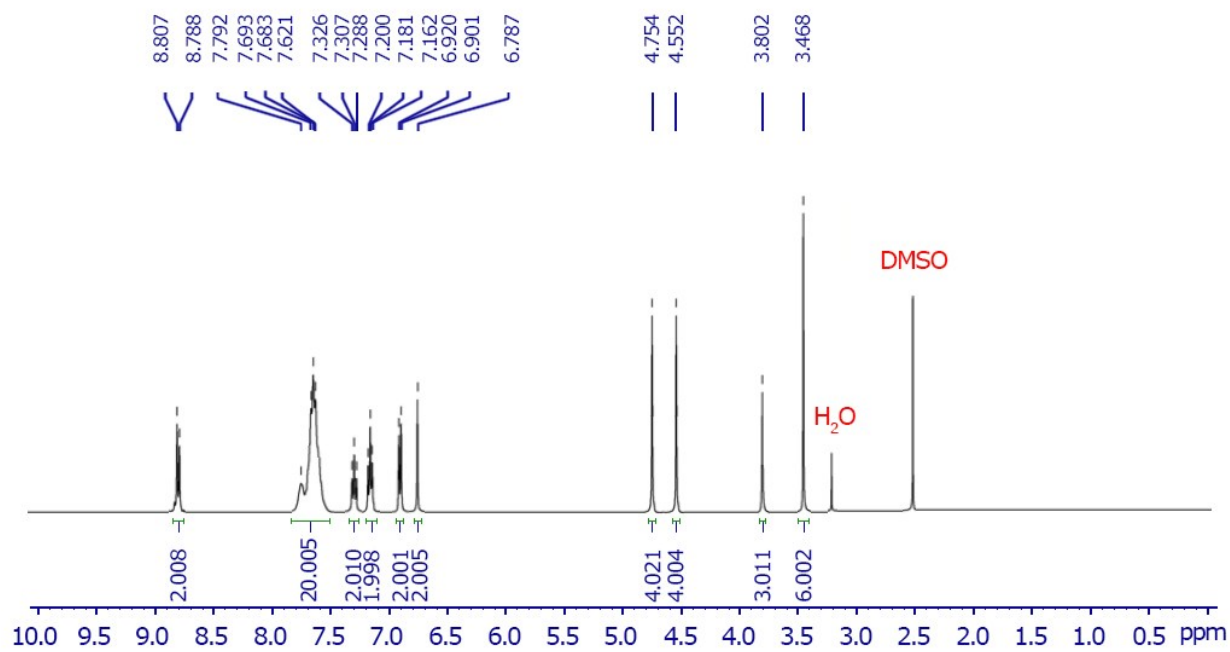

**Fig. S1.** <sup>1</sup>H NMR spectrum of complex **1** (DMSO-*d*<sub>6</sub>).

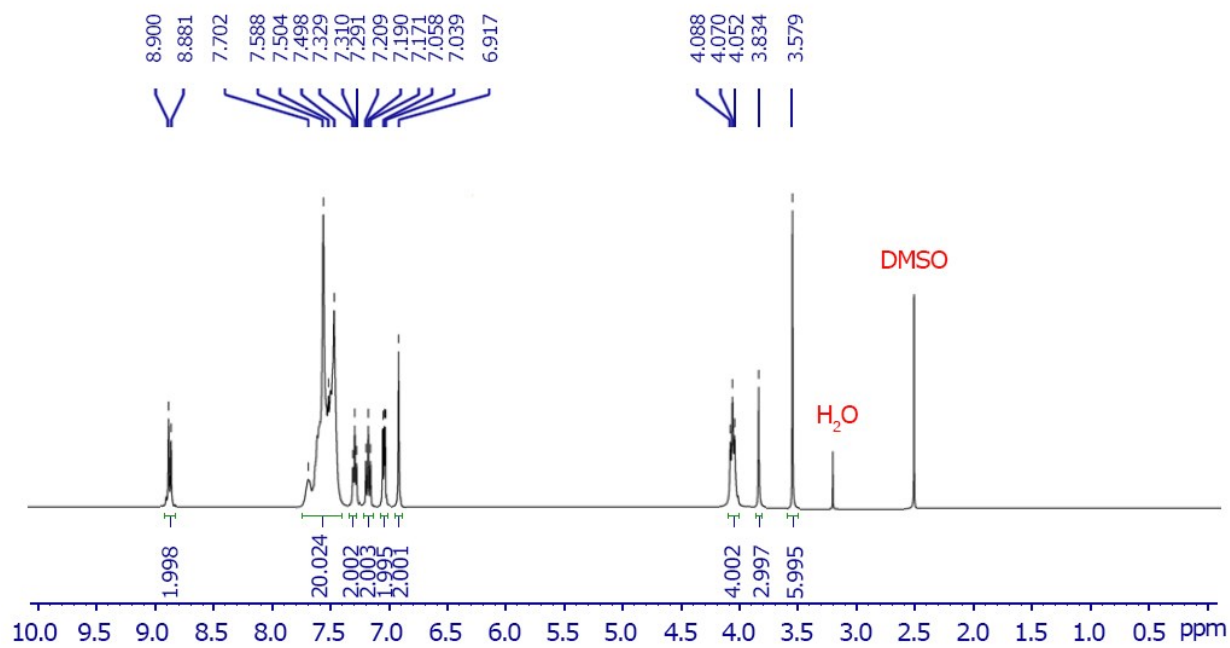

**Fig. S2.** <sup>1</sup>H NMR spectrum of complex **2** (DMSO-*d*<sub>6</sub>).

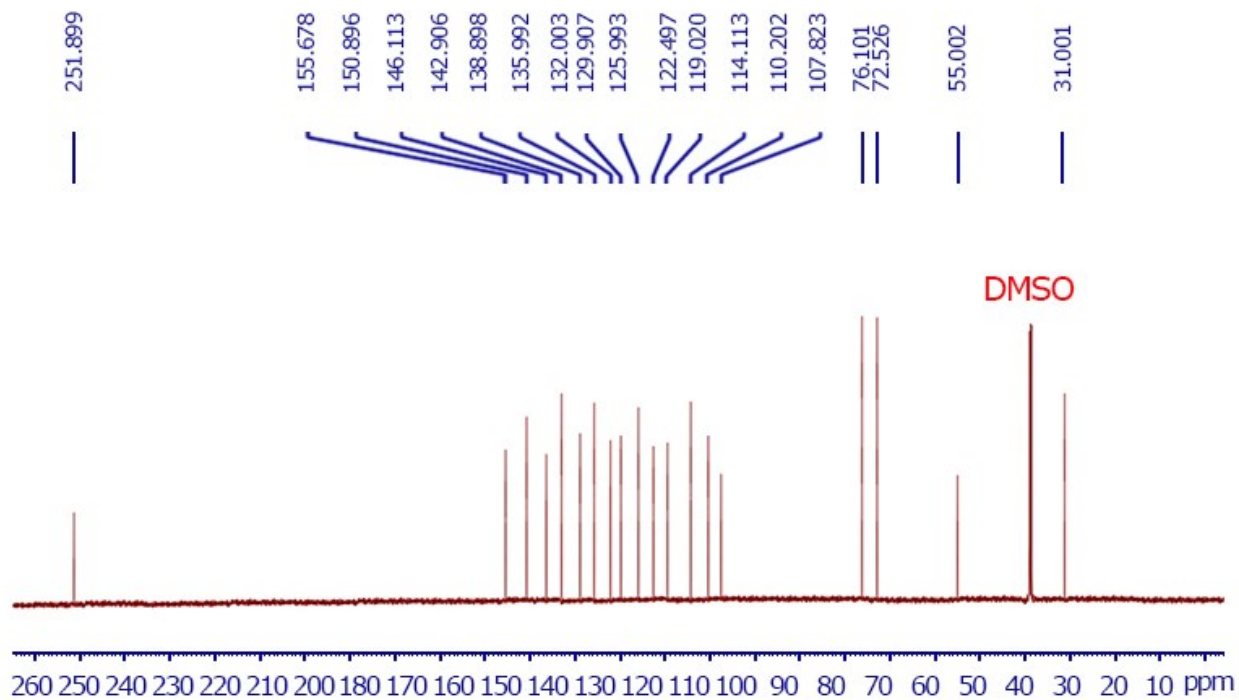

**Fig. S3.**  $^{13}\text{C}$  NMR spectrum of complex **1** ( $\text{DMSO-}d_6$ ).

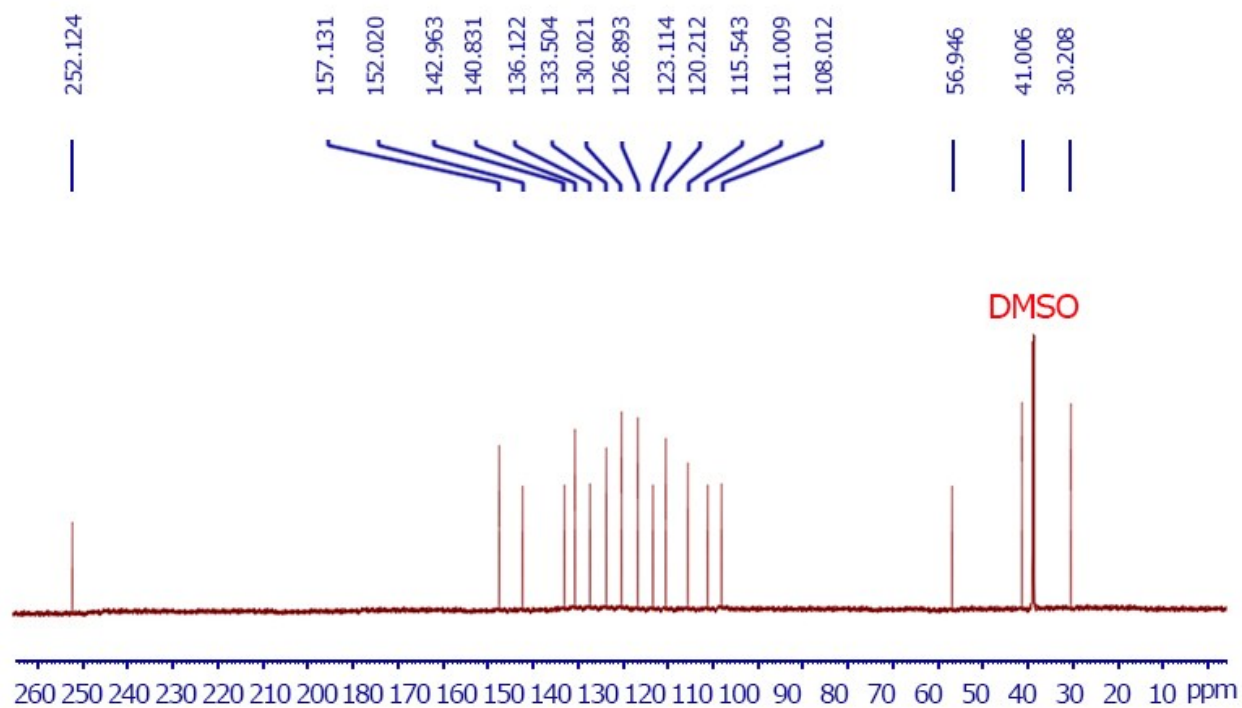

**Fig. S4.**  $^{13}\text{C}$  NMR spectrum of complex 2 ( $\text{DMSO-}d_6$ ).

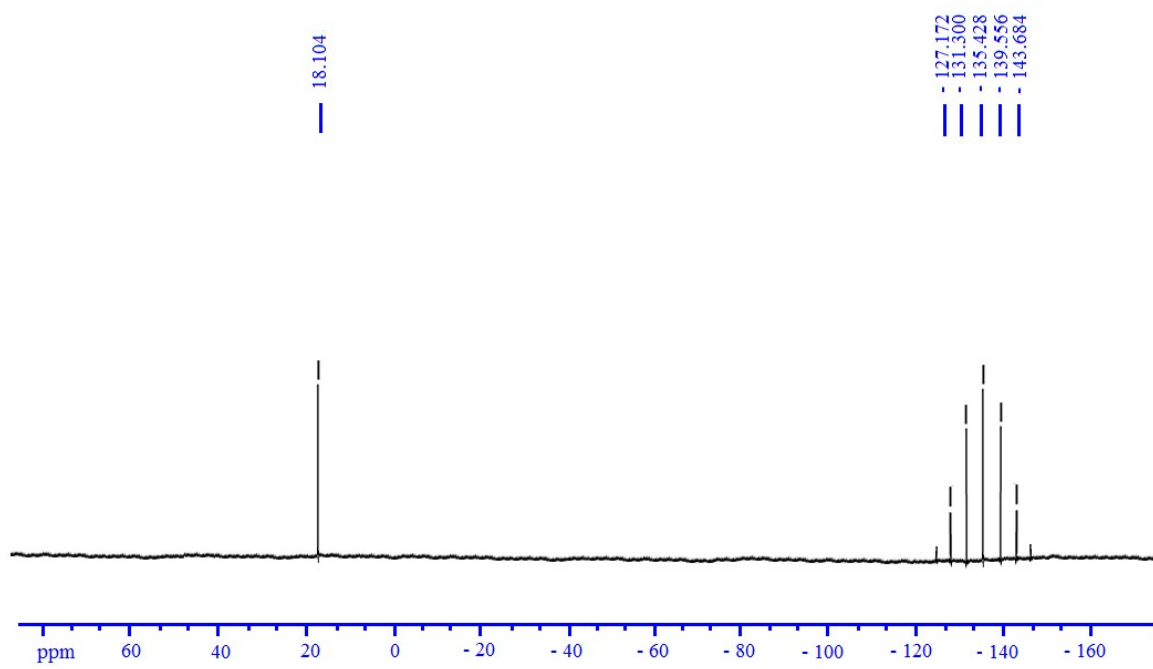

**Fig. S5.**  $^{31}\text{P}$   $\{^1\text{H}\}$  NMR spectrum of complex **1** ( $\text{DMSO-}d_6$ ).

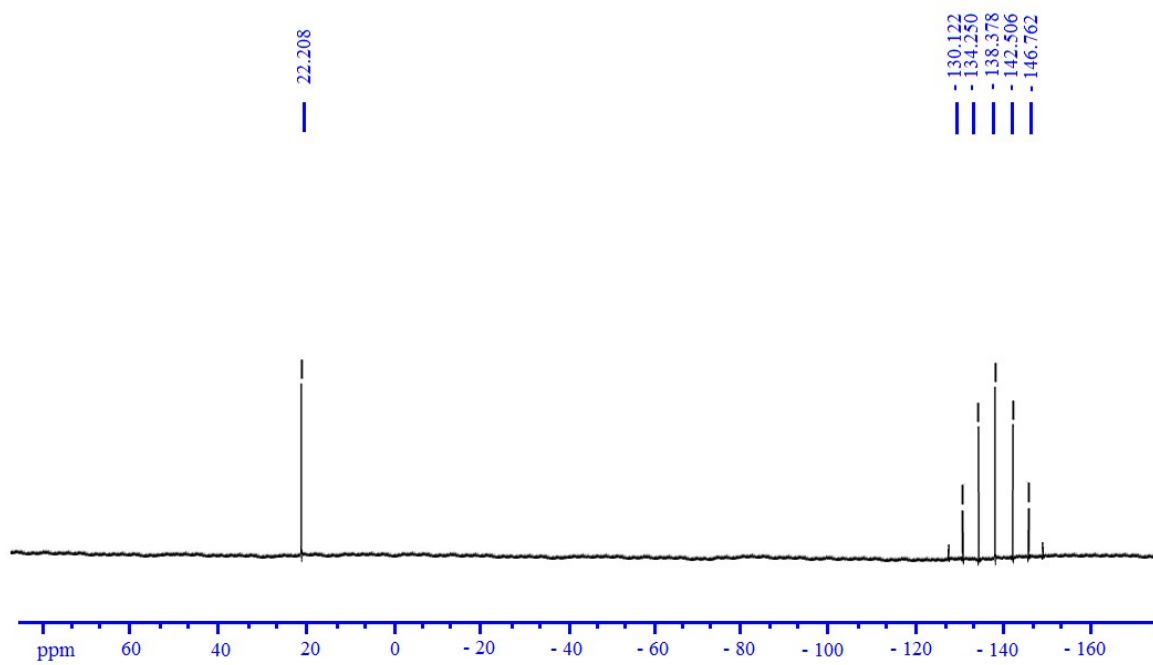

**Fig. S6.**  $^{31}\text{P}$   $\{^1\text{H}\}$  NMR spectrum of complex **2** ( $\text{DMSO-}d_6$ ).

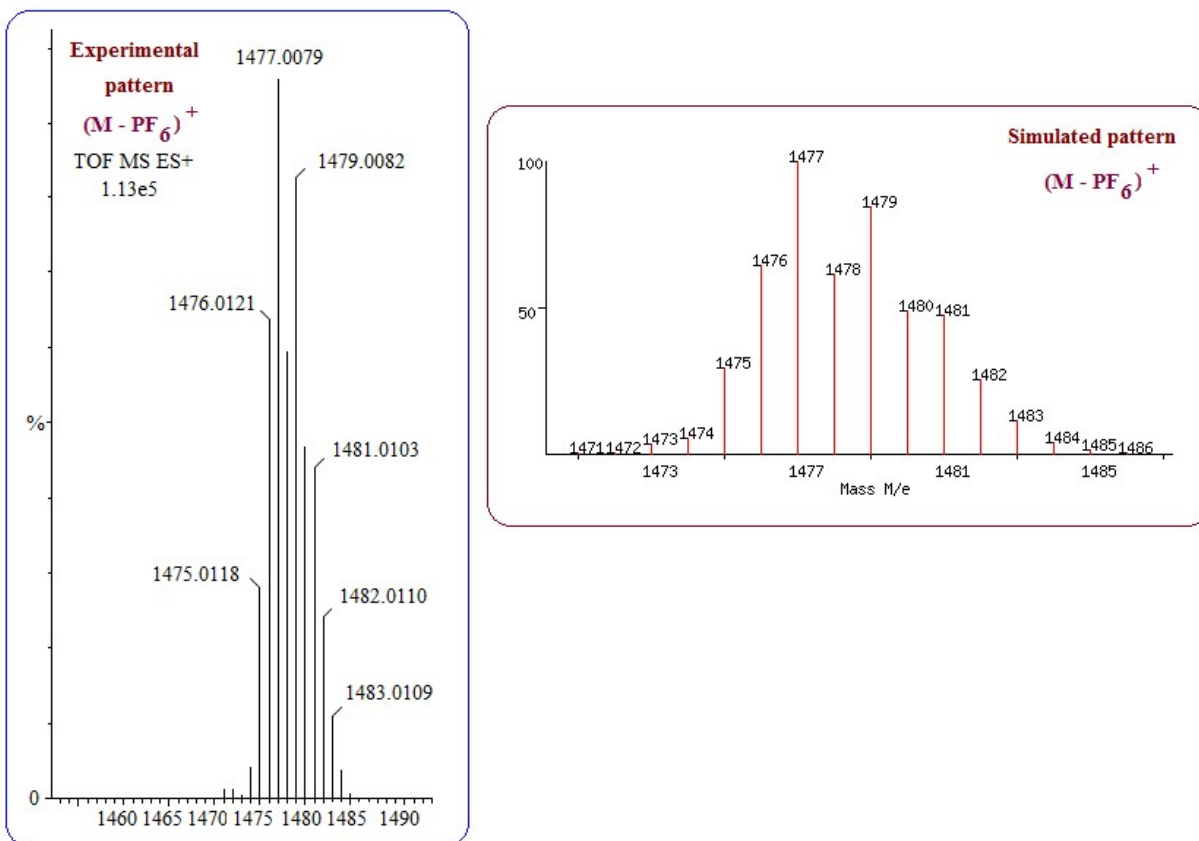

**Fig. S7.** TOF MS spectrum of complex 1.



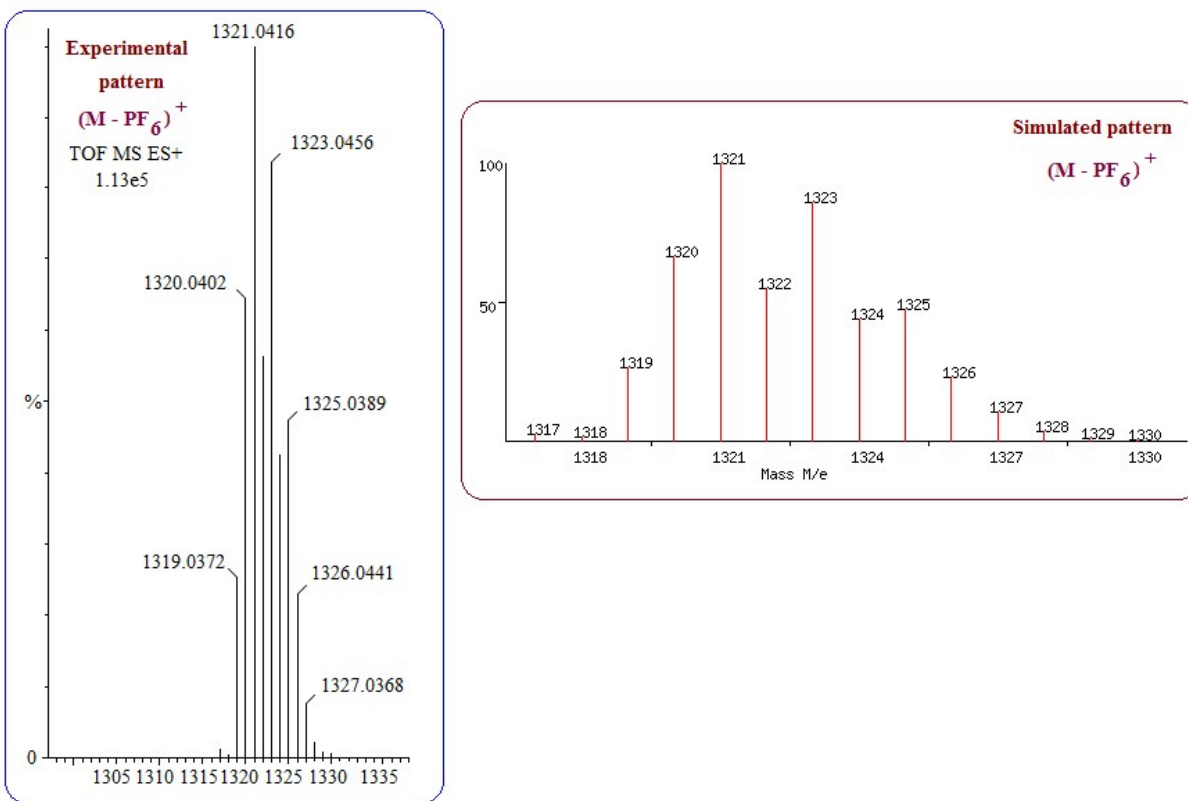

**Fig. S8.** TOF MS spectrum of complex 2.

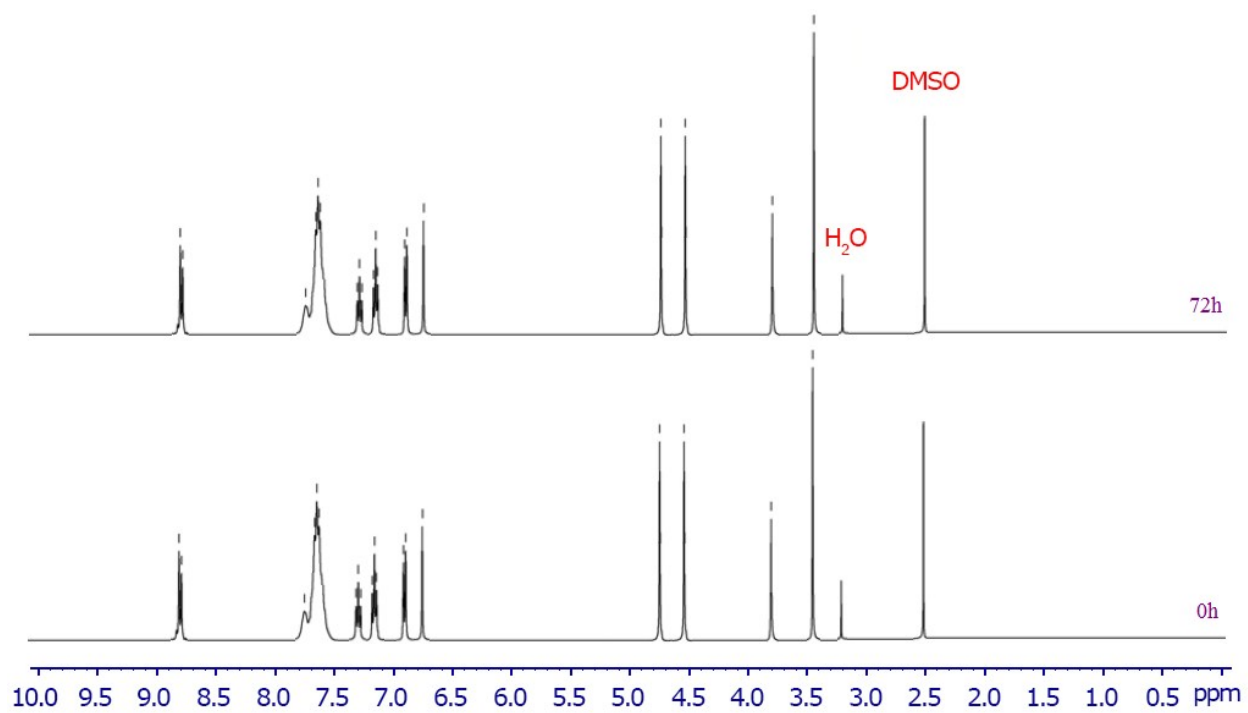

**Fig. S9.**  $^1\text{H}$  NMR spectrum of complex **1** in  $\text{DMSO-}d_6$  solution at  $37^\circ\text{C}$  after 3 minutes (bottom) and after 72 h incubation (top).

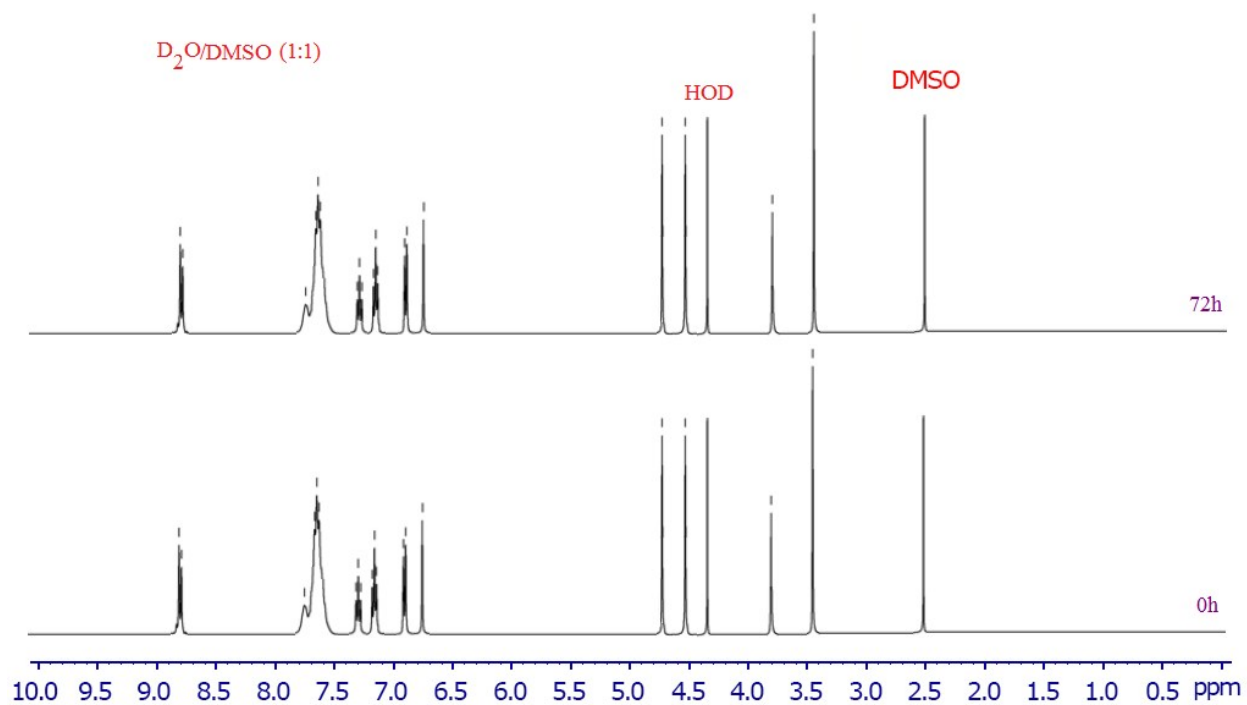

**Fig. S10.**  $^1\text{H}$  NMR spectrum of complex **1** from a 1:1 mixture ( $\text{DMSO-}d_6$ ): $\text{D}_2\text{O}$  solution at  $37\text{ }^\circ\text{C}$  after 3 minutes (bottom) and after 72 h incubation (top).

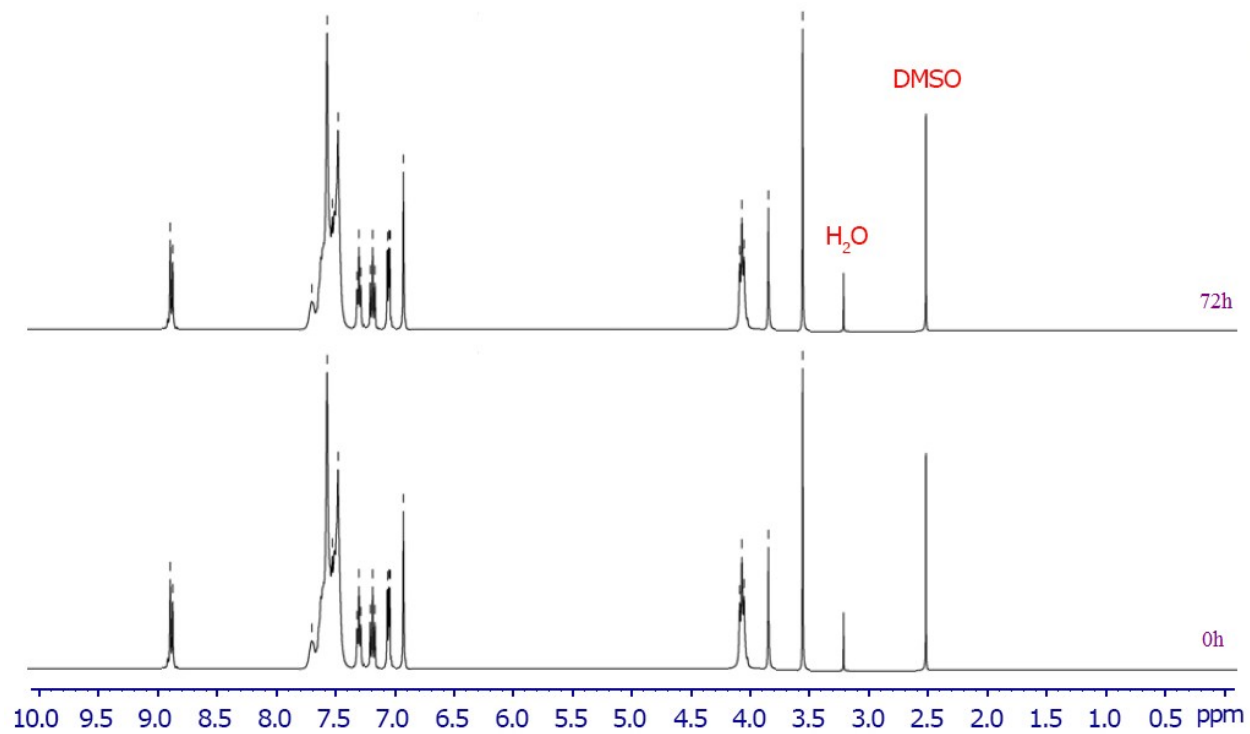

**Fig. S11.**  $^1\text{H}$  NMR spectrum of complex **2** in  $\text{DMSO-}d_6$  solution at  $37\text{ }^\circ\text{C}$  after 3 minutes (bottom) and after 72 h incubation (top).

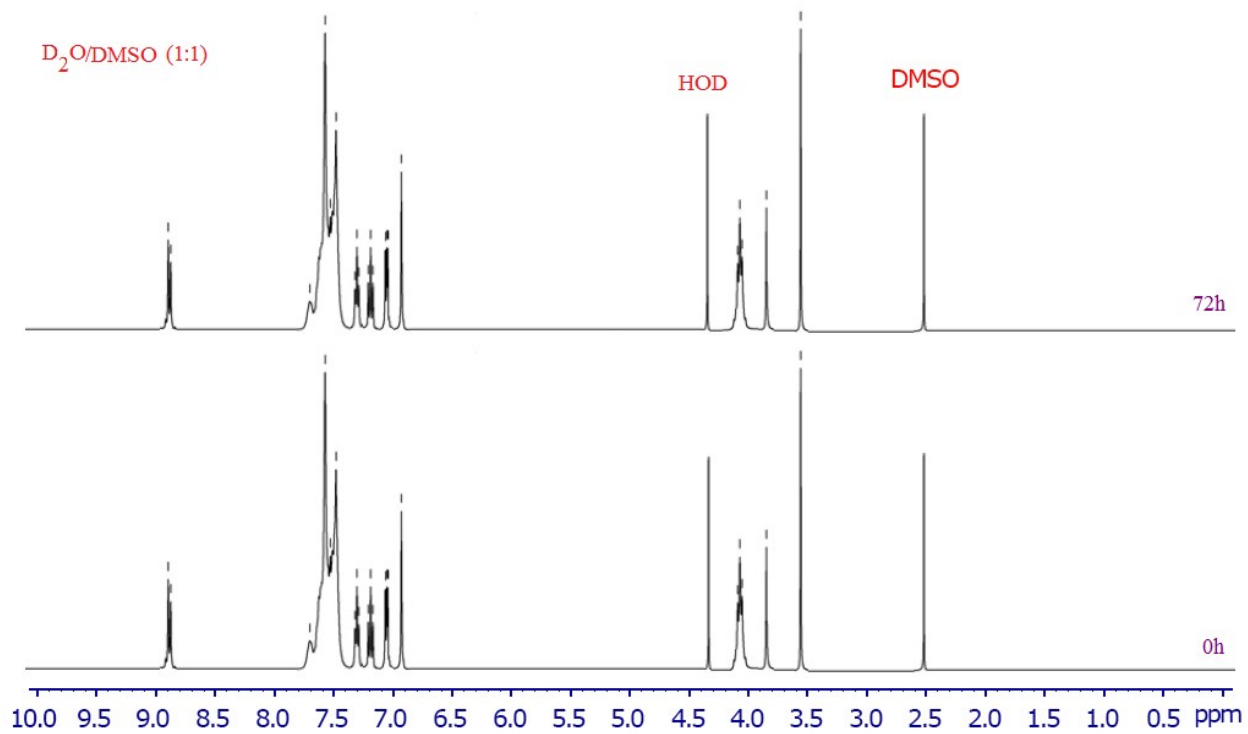

**Fig. S12.**  $^1\text{H}$  NMR spectrum of complex **2** from a 1:1 mixture ( $\text{DMSO-}d_6$ ): $\text{D}_2\text{O}$  solution at  $37\text{ }^\circ\text{C}$  after 3 minutes (bottom) and after 72 h incubation (top).

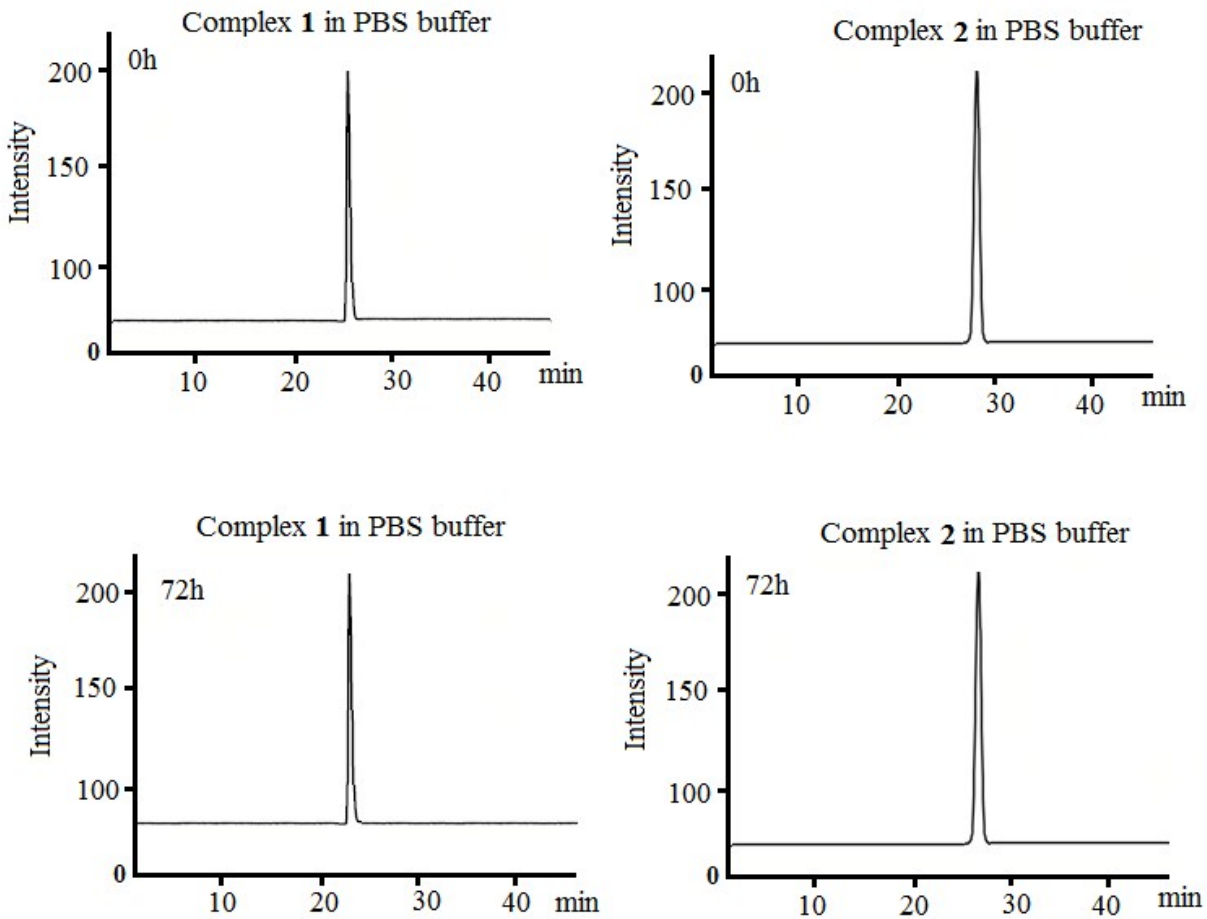

**Fig. S13.** HPLC of the complexes 1 and 2 in freshly prepared PBS buffer/5% DMSO solution recorded after 3 minutes (bottom) and after 72 h of incubation time at 37 °C.

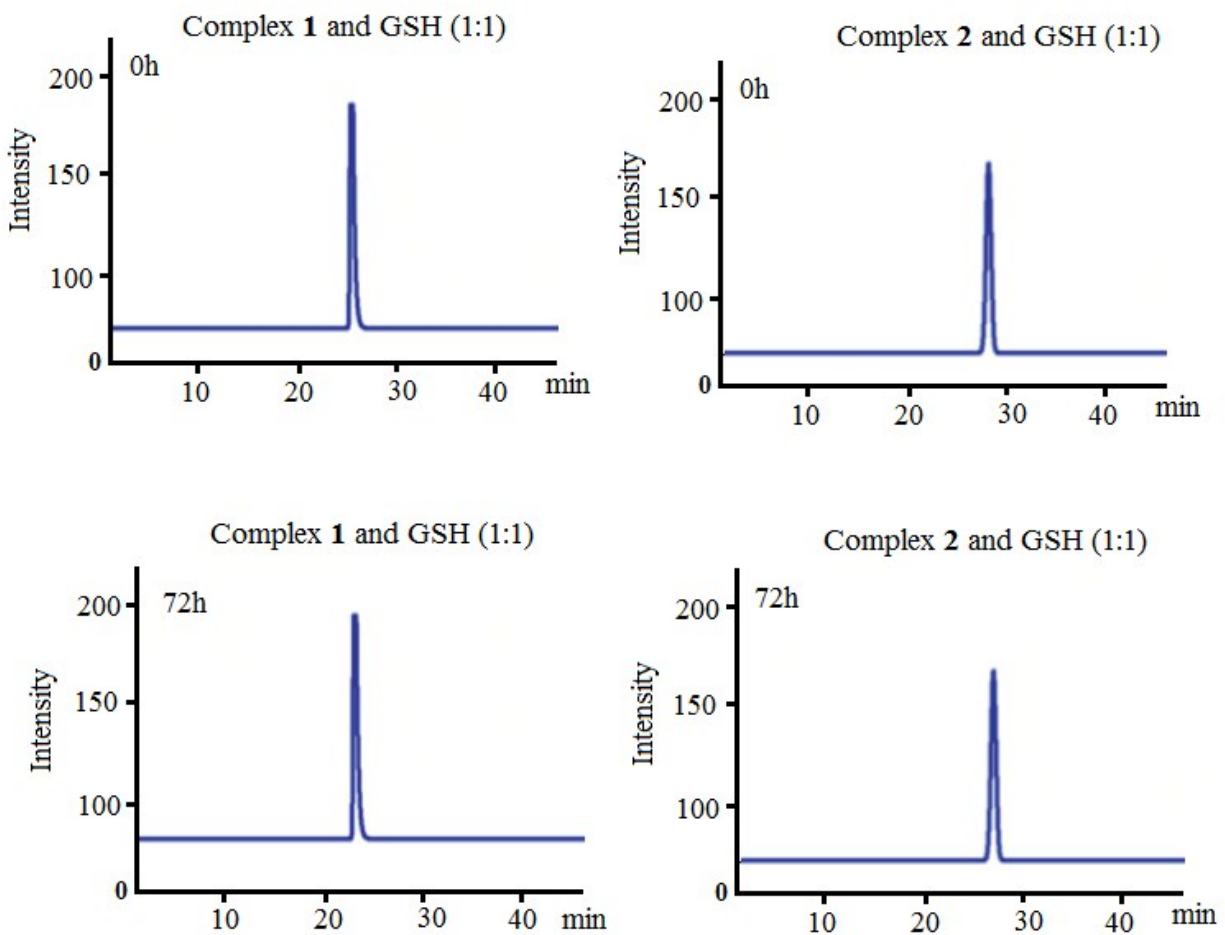

**Fig. S14.** HPLC of the complex 1 or 2: Glutathione (GSH) (1:1) in freshly prepared PBS buffer/5% DMSO solution recorded after 3 minutes (bottom) and after 72 h of incubation time at 37 °C.

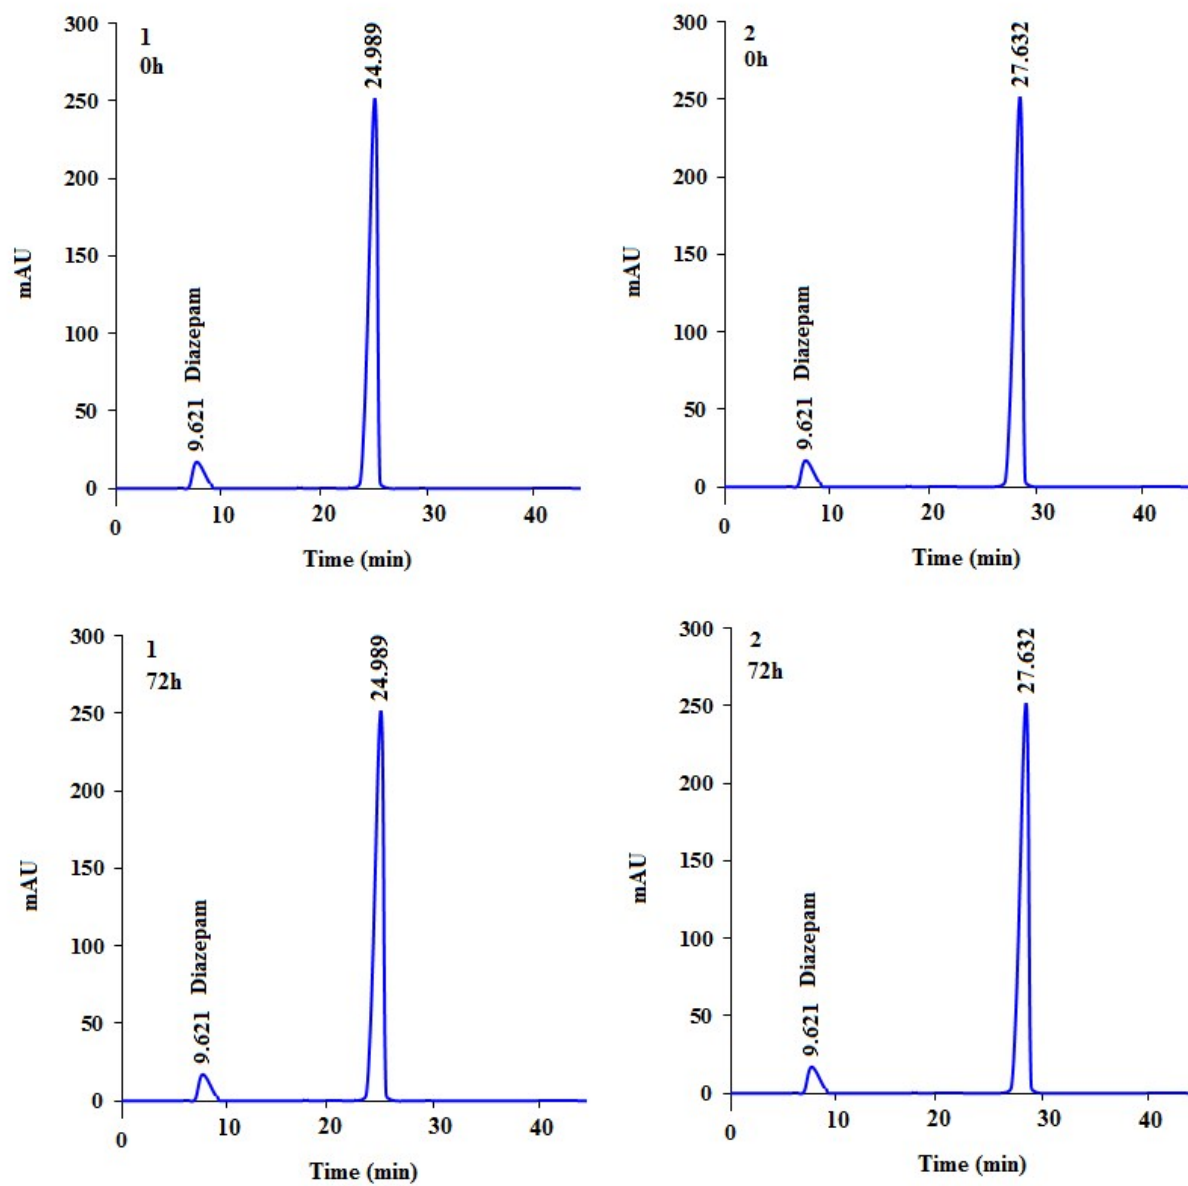

**Fig. S15.** LC-UV traces of plasma incubated with complexes **1** and **2** (20  $\mu$ M, 37  $^{\circ}$ C) at  $t = 0$  and 72 h. (Diazepam was used as internal standard).
